# Supplementary material for: Genetic Consequences of Antiviral Therapy on HIV-1
Source: Hindawi journal article supplement (doi:10.1155/2015/395826), 2015-01-01
Supplement: f1 [file 395826.f1.pdf]

## Supplementary Material

### Genetic Consequences of Antiviral Therapy on HIV-1

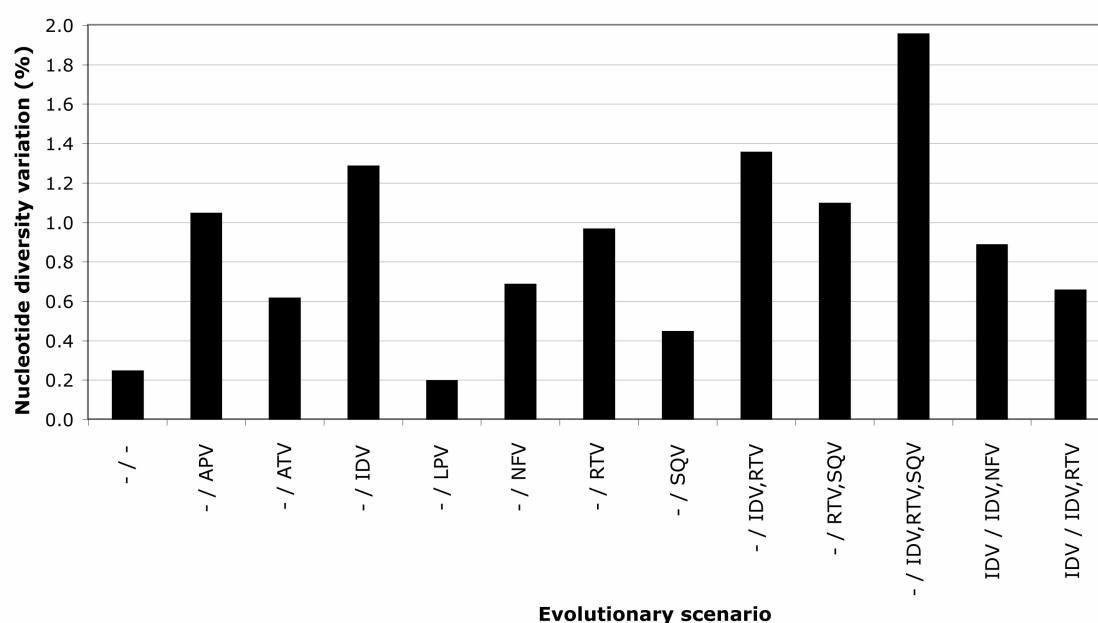

**Figure S1. Nucleotide diversity variation.** Variation of nucleotide diversity (pairwise nucleotide differences per site  $\pi$ ) between the two datasets of each evolutionary scenario ( $\pi_{\text{after treatment}} - \pi_{\text{before treatment}}$ ). “-” indicates naïve-treatment patients. Reference values are shown in Table S2.

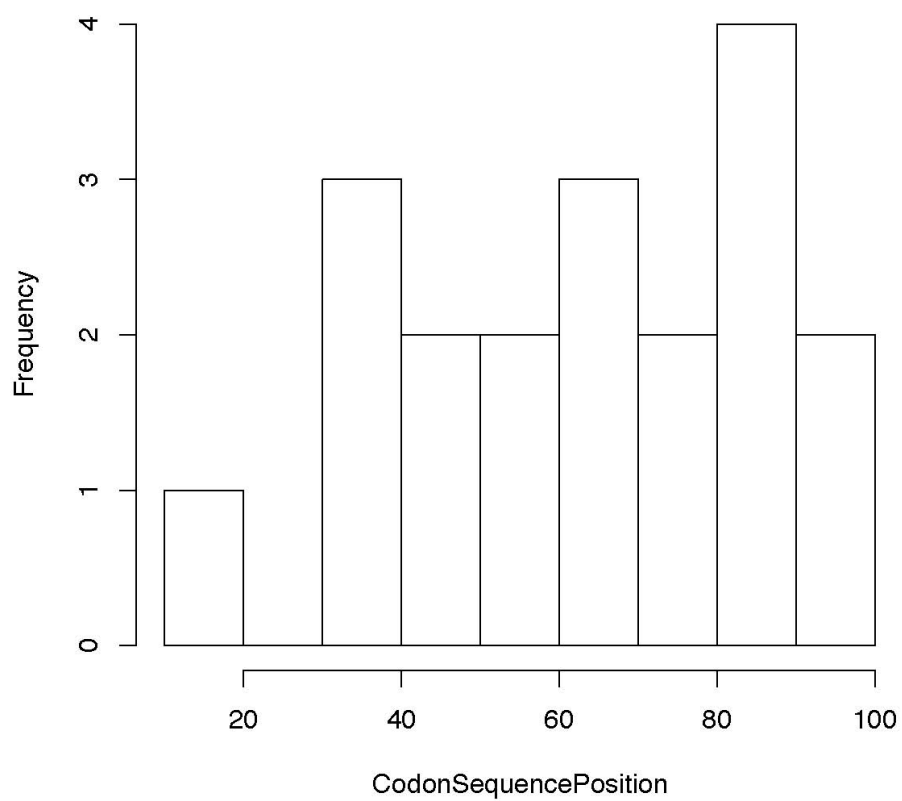

**Figure S2. Histogram on the distribution of the significant nonsynonymous substitutions (95% CI), induced by the studied PIs, along the PR coding gene. Further details are included in Table S4.**

**Table S1. Estimates of overall mean distance with *MEGA*.**

| Dataset                            | Overall mean distance | Standard error |
|------------------------------------|-----------------------|----------------|
| - / - (before treatment)           | 0.001                 | 0.000          |
| - / - (after treatment)            | 0.002                 | 0.001          |
| - / APV (before treatment)         | 0.028                 | 0.005          |
| - / APV (after treatment)          | 0.050                 | 0.006          |
| - / ATV (before treatment)         | 0.034                 | 0.005          |
| - / ATV (after treatment)          | 0.045                 | 0.007          |
| - / IDV (before treatment)         | 0.029                 | 0.005          |
| - / IDV (after treatment)          | 0.050                 | 0.006          |
| - / LPV (before treatment)         | 0.052                 | 0.007          |
| - / LPV (after treatment)          | 0.051                 | 0.008          |
| - / NFV (before treatment)         | 0.003                 | 0.001          |
| - / NFV (after treatment)          | 0.003                 | 0.001          |
| - / RTV (before treatment)         | 0.038                 | 0.006          |
| - / RTV (after treatment)          | 0.051                 | 0.007          |
| - / SQV (before treatment)         | 0.047                 | 0.007          |
| - / SQV (after treatment)          | 0.052                 | 0.006          |
| - / IDV,RTV (before treatment)     | 0.059                 | 0.010          |
| - / IDV,RTV (after treatment)      | 0.072                 | 0.009          |
| - / RTV,SQV (before treatment)     | 0.055                 | 0.010          |
| - / RTV,SQV (after treatment)      | 0.074                 | 0.010          |
| - / IDV,RTV,SQV (before treatment) | 0.050                 | 0.007          |
| - / IDV,RTV,SQV (after treatment)  | 0.072                 | 0.008          |
| IDV / IDV,NFV (before treatment)   | 0.057                 | 0.008          |
| IDV / IDV,NFV (after treatment)    | 0.069                 | 0.010          |
| IDV / IDV,RTV (before treatment)   | 0.073                 | 0.008          |
| IDV / IDV,RTV (after treatment)    | 0.083                 | 0.010          |

**Table S2. Estimates of nucleotide genetic diversity.**

| Dataset                            | $\pi$  |
|------------------------------------|--------|
| - / - (before treatment)           | 0.0653 |
| - / - (after treatment)            | 0.0678 |
| - / APV (before treatment)         | 0.0376 |
| - / APV (after treatment)          | 0.0481 |
| - / ATV (before treatment)         | 0.0479 |
| - / ATV (after treatment)          | 0.0541 |
| - / IDV (before treatment)         | 0.0498 |
| - / IDV (after treatment)          | 0.0627 |
| - / LPV (before treatment)         | 0.0739 |
| - / LPV (after treatment)          | 0.0759 |
| - / NFV (before treatment)         | 0.0429 |
| - / NFV (after treatment)          | 0.0498 |
| - / RTV (before treatment)         | 0.0496 |
| - / RTV (after treatment)          | 0.0593 |
| - / SQV (before treatment)         | 0.0474 |
| - / SQV (after treatment)          | 0.0519 |
| - / IDV,RTV (before treatment)     | 0.0584 |
| - / IDV,RTV (after treatment)      | 0.0720 |
| - / RTV,SQV (before treatment)     | 0.0577 |
| - / RTV,SQV (after treatment)      | 0.0687 |
| - / IDV,RTV,SQV (before treatment) | 0.0485 |
| - / IDV,RTV,SQV (after treatment)  | 0.0681 |
| IDV / IDV,NFV (before treatment)   | 0.0601 |
| IDV / IDV,NFV (after treatment)    | 0.0690 |
| IDV / IDV,RTV (before treatment)   | 0.0721 |
| IDV / IDV,RTV (after treatment)    | 0.0787 |

**Table S3. Estimates of molecular adaptation with *Hyphy*.**

| Dataset                            | $dN/dS$ | 95%CI down | 95%CI up |
|------------------------------------|---------|------------|----------|
| - / - (before treatment)           | 0.456   | 0.456      | 0.457    |
| - / - (after treatment)            | 0.445   | 0.445      | 0.445    |
| - / APV (before treatment)         | 0.248   | 0.176      | 0.339    |
| - / APV (after treatment)          | 0.315   | 0.236      | 0.410    |
| - / ATV (before treatment)         | 0.222   | 0.172      | 0.281    |
| - / ATV (after treatment)          | 0.254   | 0.201      | 0.315    |
| - / IDV (before treatment)         | 0.301   | 0.263      | 0.342    |
| - / IDV (after treatment)          | 0.379   | 0.340      | 0.422    |
| - / LPV (before treatment)         | 0.264   | 0.222      | 0.312    |
| - / LPV (after treatment)          | 0.269   | 0.227      | 0.315    |
| - / NFV (before treatment)         | 0.235   | 0.217      | 0.253    |
| - / NFV (after treatment)          | 0.268   | 0.250      | 0.286    |
| - / RTV (before treatment)         | 0.242   | 0.190      | 0.303    |
| - / RTV (after treatment)          | 0.302   | 0.246      | 0.367    |
| - / SQV (before treatment)         | 0.250   | 0.201      | 0.306    |
| - / SQV (after treatment)          | 0.268   | 0.220      | 0.322    |
| - / IDV,RTV (before treatment)     | 0.233   | 0.163      | 0.322    |
| - / IDV,RTV (after treatment)      | 0.244   | 0.178      | 0.325    |
| - / RTV,SQV (before treatment)     | 0.206   | 0.147      | 0.279    |
| - / RTV,SQV (after treatment)      | 0.271   | 0.204      | 0.351    |
| - / IDV,RTV,SQV (before treatment) | 0.264   | 0.184      | 0.363    |
| - / IDV,RTV,SQV (after treatment)  | 0.529   | 0.412      | 0.666    |
| IDV / IDV,NFV (before treatment)   | 0.402   | 0.310      | 0.510    |
| IDV / IDV,NFV (after treatment)    | 0.495   | 0.395      | 0.611    |
| IDV / IDV,RTV (before treatment)   | 0.329   | 0.261      | 0.409    |
| IDV / IDV,RTV (after treatment)    | 0.442   | 0.360      | 0.536    |

**Table S4. Number and position of positively selected sites and negatively selected sites.** Only detected positively selected sites (PSSs) and negatively selected sites (NSSs) at 95% CI are shown. For each PSS the corresponding *p*-value is indicated after the parenthesis. “-” indicates naïve-treatment patients.

| Scenario | DataSet | PSSs                                                                                                     | NSSs                                                                                                                                                                                                                                                                                                                                                                                                 |
|----------|---------|----------------------------------------------------------------------------------------------------------|------------------------------------------------------------------------------------------------------------------------------------------------------------------------------------------------------------------------------------------------------------------------------------------------------------------------------------------------------------------------------------------------------|
| 1        | -       | 0                                                                                                        | 93:<br>1,2, 3, 4, 5, 6, 7, 8, 9, 11, 12, 13, 14, 15, 16,<br>17, 18, 20, 21, 22, 23, 24, 25, 26, 27, 28, 29,<br>30, 31, 32, 33, 34, 36, 38, 39, 40, 41, 43, 44,<br>45, 46, 47, 48, 49, 50, 51, 52, 53, 54, 55, 56,<br>57, 58, 59, 60, 61, 62, 64, 65, 66, 67, 68, 69,<br>70, 71, 72, 73, 74, 75, 76, 77, 78, 79, 80, 81,<br>82, 83, 84, 85, 86, 87, 88, 89, 90, 91, 92, 93,<br>94, 95, 96, 97, 98, 99 |
|          | -       | 0                                                                                                        | 92:<br>1,2, 3, 4, 5, 6, 7, 8, 9, 11, 12, 13, 14, 15, 16,<br>17, 18, 20, 21, 22, 23, 24, 25, 26, 27, 28, 29,<br>30, 31, 32, 33, 34, 36, 38, 39, 40, 41, 43, 44,<br>45, 46, 47, 48, 49, 50, 51, 52, 53, 54, 55, 56,<br>57, 58, 59, 60, 61, 62, 64, 65, 66, 67, 68, 69,<br>70, 71, 72, 73, 74, 75, 76, 78, 79, 80, 81, 82,<br>83, 84, 85, 86, 87, 88, 89, 90, 91, 92, 93, 94,<br>95, 96, 97, 98, 99     |
| 2        | -       | 1:<br>63 (0)                                                                                             | 26:<br>1, 3, 11, 17, 20, 22, 25, 27, 28, 31, 32, 34,<br>44, 47, 66, 67, 68, 70, 73, 74, 75, 79, 81, 83,<br>94, 98                                                                                                                                                                                                                                                                                    |
|          | APV     | 2:<br>37 (0.00248), 63<br>(0.00002)                                                                      | 34:<br>11, 12, 20, 21, 22, 25, 27, 28, 29, 32, 40, 44,<br>45, 46, 49, 54, 56, 66, 68, 79, 80, 81, 82, 83,<br>85, 86, 87, 88, 91, 94, 95, 96, 98, 99                                                                                                                                                                                                                                                  |
| 3        | -       | 1:<br>37 (0.01383)                                                                                       | 43:<br>7, 7, 9, 11, 16, 17, 20, 21, 22, 24, 25, 28, 30,<br>33, 34, 38, 39, 40, 43, 44, 46, 52, 58, 61, 65,<br>66, 68, 75, 76, 79, 80, 81, 83, 86, 87, 90, 91,<br>92, 94, 95, 96, 97, 99                                                                                                                                                                                                              |
|          | ATV     | 2:<br>63 (0.00404), 93<br>(0.03112)                                                                      | 36:<br>7, 9, 11, 17, 20, 21, 22, 24, 25, 28, 34, 38,<br>39, 44, 46, 52, 58, 61, 65, 66, 68, 75, 76, 79,<br>80, 81, 83, 86, 87, 90, 91, 92, 94, 95, 96, 99                                                                                                                                                                                                                                            |
| 4        | -       | 5:<br>10 (0.00008), 35<br>(0.01782), 37 (0.00002),<br>63 (0), 93 (0.03455)                               | 64:<br>1, 2, 3, 4, 5, 6, 7, 8, 9, 11, 16, 21, 22, 23, 24,<br>25, 26, 27, 29, 30, 32, 33, 38, 39, 40, 43, 45,<br>46, 48, 51, 52, 54, 58, 60, 61, 64, 65, 66, 67,<br>68, 73, 74, 75, 76, 78, 79, 80, 81, 82, 84, 85,<br>86, 87, 88, 90, 92, 94, 95, 96, 97, 98, 99                                                                                                                                     |
|          | IDV     | 7:<br>10 (0), 35 (0.01837), 37<br>(0.00024), 46 (0.04753),<br>63 (0.00198), 71<br>(0.04103), 93 (0.0121) | 58:<br>1, 2, 3, 4, 5, 7, 8, 9, 11, 16, 17, 21, 22, 23,<br>25, 26, 27, 30, 32, 34, 38, 39, 40, 43, 45, 47,<br>48, 51, 52, 53, 55, 58, 59, 60, 61, 65, 66, 67,<br>68, 70, 74, 75, 78, 79, 80, 81, 83, 85, 86, 87,<br>88, 92, 94, 95, 96, 97, 98, 99                                                                                                                                                    |
| 5        | -       | 3:                                                                                                       | 54:                                                                                                                                                                                                                                                                                                                                                                                                  |

|   |          |                                                     |                                                                                                                                                                                                                                                                                                                                                                       |
|---|----------|-----------------------------------------------------|-----------------------------------------------------------------------------------------------------------------------------------------------------------------------------------------------------------------------------------------------------------------------------------------------------------------------------------------------------------------------|
|   |          | 10 (0.01485), 37<br>(0.01689), 63 (0.00001)         | 1, 2, 3, 4, 7, 9, 11, 14, 16, 17, 21, 22, 23, 24,<br>25, 27, 32, 38, 40, 43, 45, 48, 52, 54, 55, 56,<br>57, 58, 65, 66, 67, 68, 71, 72, 74, 75, 76, 78,<br>79, 80, 82, 83, 84, 86, 87, 88, 91, 92, 94, 95,<br>96, 97, 98, 99                                                                                                                                          |
|   | LPV      | 3:<br>10 (0.00749), 37<br>(0.02511), 63 (0.00017)   | 54:<br>1, 2, 3, 7, 9, 11, 14, 16, 17, 21, 22, 23, 24,<br>25, 27, 32, 38, 40, 46, 48, 51, 52, 54, 55, 56,<br>57, 58, 65, 66, 67, 68, 69, 71, 72, 74, 75, 76,<br>78, 79, 80, 83, 86, 87, 88, 90, 91, 92, 94, 95,<br>96, 97, 98, 99                                                                                                                                      |
| 6 | -        | 3:<br>19 (0.04020), 37 (0), 63<br>(0)               | 86:<br>1,2, 3, 4, 5, 6, 7, 8, 9, 11, 13, 14, 15, 16, 17,<br>18, 20, 21, 22, 23, 24, 25, 26, 27, 28, 29, 30,<br>31, 32, 33, 34, 36, 38, 39, 40, 42, 43, 44, 45,<br>46, 48, 49, 50, 51, 52, 53, 54, 55, 56, 57, 58,<br>59, 60, 61, 65, 66, 67, 68, 69, 70, 71, 73, 74,<br>75, 76, 78, 79, 80, 81, 82, 83, 84, 85, 86, 87,<br>88, 89, 90, 91, 92, 94, 95, 96, 97, 98, 99 |
|   | NFV      | 4:<br>10 (0.01775), 19<br>(0.00295), 37 (0), 63 (0) | 83:<br>1,2, 3, 4, 5, 6, 7, 8, 9, 11, 14, 15, 16, 17, 18,<br>20, 21, 22, 23, 24, 25, 26, 27, 28, 29, 30, 31,<br>32, 33, 34, 36, 38, 39, 40, 42, 43, 45, 46, 48,<br>49, 50, 51, 52, 53, 54, 55, 56, 58, 59, 60, 61,<br>65, 66, 67, 68, 70, 71, 73, 74, 75, 76, 78, 79,<br>80, 81, 82, 83, 84, 85, 86, 87, 88, 89, 90, 91,<br>92, 94, 95, 96, 97, 98, 99                 |
| 7 | -        | 1:<br>63 (0.00020)                                  | 39:<br>1, 2, 3, 6, 7, 11, 16, 17, 18, 22, 23, 27, 28,<br>33, 38, 40, 43, 45, 50, 52, 55, 56, 58, 61, 66,<br>68, 75, 78, 80, 81, 85, 87, 88, 91, 92, 94, 95,<br>96, 97                                                                                                                                                                                                 |
|   | RTV      | 1:<br>63 (0.00011)                                  | 40:<br>1, 2, 3, 7, 11, 14, 16, 17, 18, 22, 23, 24, 27,<br>28, 38, 40, 46, 48, 50, 52, 55, 56, 58, 61, 66,<br>68, 75, 76, 78, 80, 81, 85, 87, 88, 92, 94, 95,<br>96, 97, 99                                                                                                                                                                                            |
| 8 | -        | 1:<br>63 (0)                                        | 41:<br>2, 7, 9, 16, 17, 18, 20, 21, 23, 25, 27, 30, 33,<br>34, 40, 43, 44, 48, 52, 54, 55, 57, 58, 65, 66,<br>68, 70, 75, 76, 83, 86, 87, 88, 91, 92, 94, 95,<br>96, 97, 98, 99                                                                                                                                                                                       |
|   | SQV      | 2:<br>35 (0.02464), 63<br>(0.00005)                 | 43:<br>1, 2, 7, 9, 16, 17, 18, 20, 21, 23, 24, 25, 27,<br>30, 31, 33, 34, 40, 43, 44, 51, 52, 54, 55, 66,<br>68, 70, 75, 76, 79, 82, 83, 86, 87, 88, 91, 92,<br>94, 95, 96, 97, 98, 99                                                                                                                                                                                |
| 9 | -        | 1:<br>63 (0,00397)                                  | 29:<br>4, 9, 14, 17, 21, 25, 29, 35, 37, 39, 40, 45,<br>48, 52, 54, 57, 66, 70, 72, 75, 80, 87, 88, 91,<br>94, 95, 96, 98, 99                                                                                                                                                                                                                                         |
|   | IDV, RTV | 1:<br>63 (0,03740)                                  | 29:<br>1, 7, 17, 18, 21, 25, 29, 39, 40, 45, 48, 52,<br>57, 61, 66, 70, 72, 75, 79, 80, 83, 87, 88, 91,<br>92, 94, 96, 98, 99                                                                                                                                                                                                                                         |

|    |                  |                                                                                                   |                                                                                                                                                      |
|----|------------------|---------------------------------------------------------------------------------------------------|------------------------------------------------------------------------------------------------------------------------------------------------------|
| 10 | -                | 1:<br>37 (0.00600)                                                                                | 28:<br>1, 3, 9, 14, 16, 17, 20, 27, 40, 47, 54, 56, 66,<br>67, 70, 74, 75, 76, 79, 82, 85, 86, 87, 88, 94,<br>95, 96, 98, 99                         |
|    | RTV, SQV         | 2:<br>35 (0.04481), 37<br>(0.03160)                                                               | 32:<br>1, 2, 3, 9, 14, 15, 16, 17, 18, 20, 27, 40, 56,<br>57, 61, 65, 66, 67, 68, 75, 79, 81, 83, 85, 87,<br>88, 91, 92, 94, 95, 96, 98, 99          |
| 11 | -                | 1:<br>77 (0.01112)                                                                                | 12:<br>15, 22, 29, 40, 51, 60, 72, 74, 83, 84, 91, 94,                                                                                               |
|    | IDV, RTV,<br>SQV | 6:<br>54 (0.01354), 63<br>(0.02167), 77 (0.00462),<br>82 (0.03294), 90<br>(0.03597), 93 (0.00623) | 13:<br>15, 16, 17, 20, 22, 27, 45, 52, 67, 68, 83, 94,<br>99                                                                                         |
| 12 | IDV              | 3:<br>10 (0.00240), 63<br>(0.00946), 82 (0.04698)                                                 | 20:<br>14, 17, 22, 25, 40, 45, 52, 66, 68, 75, 79, 80,<br>86, 87, 91, 94, 95, 96, 98, 99                                                             |
|    | IDV, NFV         | 5:<br>10 (0.00068), 46<br>(0.00118), 62 (0.02108),<br>63 (0.00088), 90<br>(0.02295)               | 28:<br>1, 3, 4, 9, 14, 16, 17, 18, 22, 25, 28, 40, 45,<br>52, 55, 56, 58, 61, 68, 75, 79, 83, 86, 87, 94,<br>95, 96, 99                              |
| 13 | IDV              | 1:<br>10 (0.00026)                                                                                | 36:<br>1, 3, 4, 5, 6, 7, 8, 9, 11, 14, 17,, 21, 23, 25,<br>30, 32, 34, 40, 43, 48, 52, 68, 70, 73, 75, 78,<br>79, 80, 85, 86, 87, 92, 94, 95, 96, 99 |
|    | IDV, RTV         | 4:<br>10 (0.00026), 57<br>(0.04403), 72 (0.01765),<br>82 (0.03577)                                | 30:<br>1, 2, 3, 4, 5, 6, 7, 9, 11, 17, 21, 23, 25, 26,<br>27, 30, 40, 43, 48, 52, 68, 70, 75, 80, 87, 92,<br>94, 95, 96, 99                          |
